# Supplementary material
Source: publisher site journal article supplement (https://www.spandidos-publications.com/1387/downloadSupplementary)
Supplement: Supplementary file 1 [file downloadSupplementary]

## Sheet: SCI(DMSO)vsSham
Table SIV. Kyoto Encyclopedia of Genes and Genomes analysis of upregulated genes in different groups.
##Databases: KEGG PATHWAY
##Statistical test method: hypergeometric test / Fisher's exact test
##FDR correction method: Benjamini and Hochberg
#Term	Database	ID	Input number	Background number	P-Value	Corrected P-Value	Input	KEGG_ID/KO	Entrez_ID	Hyperlink
TNF signaling pathway	KEGG PATHWAY	mmu04668	51	109	2.02037e-06	0.000303285	ENSMUSG00000103439|ENSMUSG00000032487|ENSMUSG00000029380|ENSMUSG00000012519|ENSMUSG00000025958|ENSMUSG00000021367|ENSMUSG00000056501|ENSMUSG00000002948|ENSMUSG00000052684|ENSMUSG00000024927|ENSMUSG00000037405|ENSMUSG00000022221|ENSMUSG00000026029|ENSMUSG00000052837|ENSMUSG00000043613|ENSMUSG00000055994|ENSMUSG00000004056|ENSMUSG00000024235|ENSMUSG00000038648|ENSMUSG00000035385|ENSMUSG00000035352|…	mmu:11796|mmu:19225|mmu:14825|mmu:74568|mmu:12912|mmu:13614|mmu:12608|mmu:26400|mmu:16476|mmu:19697|mmu:15894|mmu:56532|mmu:12370|mmu:16477|mmu:17392|mmu:257632|mmu:11652|mmu:26410|mmu:208647|mmu:20296|mmu:20293|mmu:21926|mmu:16878|mmu:20304|mmu:14281|mmu:19766|mmu:20339|mmu:20310|mmu:21937|mmu:18035|mmu:330122|mmu:15945|mmu:16176|mmu:12702|mmu:12675|mmu:11911|mmu:320207|mmu:12977|mmu:12051|mmu:1…	11796|19225|14825|74568|12912|13614|12608|26400|16476|19697|15894|56532|12370|16477|17392|257632|11652|26410|208647|20296|20293|21926|16878|20304|14281|19766|20339|20310|21937|18035|330122|15945|16176|12702|12675|11911|320207|12977|12051|18033|11797|12633|11796|53859|26416|16193|26397|21938|26427|14102|21929|	http://www.genome.jp/kegg-bin/show_pathway?mmu04668/mmu:18033%09red/mmu:12370%09red/mmu:21929%09red/mmu:19697%09red/mmu:12675%09red/mmu:16193%09red/mmu:21926%09red/mmu:26416%09red/mmu:20339%09red/mmu:12633%09red/mmu:26410%09red/mmu:13614%09red/mmu:320207%09red/mmu:18035%09red/mmu:20310%09red/mmu:19225%09red/mmu:74568%09red/mmu:20304%09red/mmu:16878%09red/mmu:53859%09red/mmu:11911%09red/mmu:16476%…
Osteoclast differentiation	KEGG PATHWAY	mmu04380	56	126	2.28034e-06	0.000303285	ENSMUSG00000020009|ENSMUSG00000059498|ENSMUSG00000040033|ENSMUSG00000031264|ENSMUSG00000002111|ENSMUSG00000026656|ENSMUSG00000025958|ENSMUSG00000021457|ENSMUSG00000027398|ENSMUSG00000002699|ENSMUSG00000022971|ENSMUSG00000003545|ENSMUSG00000024912|ENSMUSG00000033016|ENSMUSG00000006519|ENSMUSG00000024927|ENSMUSG00000052837|ENSMUSG00000032440|ENSMUSG00000004056|ENSMUSG00000022015|ENSMUSG00000015947|…	mmu:15979|mmu:14131|mmu:20847|mmu:12229|mmu:20375|mmu:14130|mmu:12912|mmu:20963|mmu:16176|mmu:16822|mmu:15976|mmu:14282|mmu:14283|mmu:18018|mmu:13057|mmu:19697|mmu:16477|mmu:21813|mmu:11652|mmu:21943|mmu:14129|mmu:12702|mmu:19698|mmu:246256|mmu:18035|mmu:21926|mmu:16476|mmu:17972|mmu:18733|mmu:12675|mmu:18034|mmu:17970|mmu:18383|mmu:14281|mmu:20846|mmu:21808|mmu:21937|mmu:22177|mmu:16175|mmu:2168…	15979|14131|20847|12229|20375|14130|12912|20963|16176|16822|15976|14282|14283|18018|13057|19697|16477|21813|11652|21943|14129|12702|19698|246256|18035|21926|16476|17972|18733|12675|18034|17970|18383|14281|20846|21808|21937|22177|16175|21682|13058|19057|18726|26400|320207|12977|14284|18033|15975|16391|12703|53859|26416|17969|234779|16177|	http://www.genome.jp/kegg-bin/show_pathway?mmu04380/mmu:18033%09red/mmu:14131%09red/mmu:14130%09red/mmu:16391%09red/mmu:12912%09red/mmu:19057%09red/mmu:21943%09red/mmu:15976%09red/mmu:21808%09red/mmu:18726%09red/mmu:15975%09red/mmu:19697%09red/mmu:12675%09red/mmu:19698%09red/mmu:21926%09red/mmu:26416%09red/mmu:15979%09red/mmu:20375%09red/mmu:320207%09red/mmu:18034%09red/mmu:18035%09red/mmu:17970%…
NF-kappa B signaling pathway	KEGG PATHWAY	mmu04064	45	100	1.68408e-05	0.00141664	ENSMUSG00000099974|ENSMUSG00000030339|ENSMUSG00000030172|ENSMUSG00000103439|ENSMUSG00000031264|ENSMUSG00000032487|ENSMUSG00000000275|ENSMUSG00000102037|ENSMUSG00000034330|ENSMUSG00000024927|ENSMUSG00000037405|ENSMUSG00000005824|ENSMUSG00000032508|ENSMUSG00000061353|ENSMUSG00000022015|ENSMUSG00000002983|ENSMUSG00000089929|ENSMUSG00000021025|ENSMUSG00000024401|ENSMUSG00000015312|ENSMUSG00000039005|…	mmu:12047|mmu:17000|mmu:111173|mmu:11796|mmu:12229|mmu:19225|mmu:217069|mmu:12044|mmu:234779|mmu:19697|mmu:15894|mmu:50930|mmu:17874|mmu:20315|mmu:21943|mmu:19698|mmu:12045|mmu:18035|mmu:21926|mmu:17873|mmu:21898|mmu:19766|mmu:18034|mmu:266632|mmu:13000|mmu:20310|mmu:21937|mmu:16176|mmu:20963|mmu:17096|mmu:12675|mmu:11797|mmu:18792|mmu:12043|mmu:18033|mmu:230073|mmu:12475|mmu:12633|mmu:11796|mmu:…	12047|17000|111173|11796|12229|19225|217069|12044|234779|19697|15894|50930|17874|20315|21943|19698|12045|18035|21926|17873|21898|19766|18034|266632|13000|20310|21937|16176|20963|17096|12675|11797|18792|12043|18033|230073|12475|12633|11796|53859|12048|20303|16177|117149|21929|	http://www.genome.jp/kegg-bin/show_pathway?mmu04064/mmu:217069%09red/mmu:12048%09red/mmu:12043%09red/mmu:12047%09red/mmu:12045%09red/mmu:21943%09red/mmu:21929%09red/mmu:19697%09red/mmu:12675%09red/mmu:19698%09red/mmu:21926%09red/mmu:12633%09red/mmu:18033%09red/mmu:18034%09red/mmu:18035%09red/mmu:12475%09red/mmu:20310%09red/mmu:21898%09red/mmu:19225%09red/mmu:13000%09red/mmu:16177%09red/mmu:17873%…
Malaria	KEGG PATHWAY	mmu05144	28	48	2.13029e-05	0.00141664	ENSMUSG00000038067|ENSMUSG00000009376|ENSMUSG00000020717|ENSMUSG00000037405|ENSMUSG00000032508|ENSMUSG00000052305|ENSMUSG00000028864|ENSMUSG00000035352|ENSMUSG00000024401|ENSMUSG00000020592|ENSMUSG00000039005|ENSMUSG00000069917|ENSMUSG00000069919|ENSMUSG00000021253|ENSMUSG00000021702|ENSMUSG00000039239|ENSMUSG00000026582|ENSMUSG00000026580|ENSMUSG00000023885|ENSMUSG00000002944|ENSMUSG00000027398|…	mmu:12985|mmu:17295|mmu:18613|mmu:15894|mmu:17874|mmu:100503605|mmu:15234|mmu:20293|mmu:21926|mmu:20969|mmu:21898|mmu:15122|mmu:15122|mmu:21809|mmu:21828|mmu:21808|mmu:20339|mmu:20344|mmu:21826|mmu:12491|mmu:16176|mmu:16408|mmu:21825|mmu:16414|mmu:20296|mmu:24088|mmu:16193|mmu:13349|	12985|17295|18613|15894|17874|100503605|15234|20293|21926|20969|21898|15122|15122|21809|21828|21808|20339|20344|21826|12491|16176|16408|21825|16414|20296|24088|16193|13349|	http://www.genome.jp/kegg-bin/show_pathway?mmu05144/mmu:12491%09red/mmu:16408%09red/mmu:100503605%09red/mmu:21809%09red/mmu:21808%09red/mmu:21828%09red/mmu:21826%09red/mmu:16193%09red/mmu:21926%09red/mmu:21825%09red/mmu:20339%09red/mmu:17874%09red/mmu:15234%09red/mmu:12985%09red/mmu:16414%09red/mmu:20296%09red/mmu:21898%09red/mmu:20293%09red/mmu:13349%09red/mmu:20969%09red/mmu:24088%09red/mmu:186…
Influenza A	KEGG PATHWAY	mmu05164	64	170	3.242e-05	0.00172475	ENSMUSG00000020009|ENSMUSG00000032661|ENSMUSG00000066861|ENSMUSG00000000275|ENSMUSG00000021025|ENSMUSG00000034855|ENSMUSG00000024079|ENSMUSG00000040296|ENSMUSG00000036986|ENSMUSG00000018362|ENSMUSG00000002325|ENSMUSG00000002948|ENSMUSG00000022971|ENSMUSG00000024810|ENSMUSG00000063550|ENSMUSG00000024927|ENSMUSG00000037405|ENSMUSG00000026104|ENSMUSG00000032508|ENSMUSG00000026159|ENSMUSG00000090877|…	mmu:15979|mmu:246727|mmu:23960|mmu:217069|mmu:18035|mmu:15945|mmu:19106|mmu:230073|mmu:18854|mmu:16647|mmu:16391|mmu:26400|mmu:15976|mmu:77125|mmu:269966|mmu:19697|mmu:15894|mmu:20846|mmu:17874|mmu:15463|mmu:15511|mmu:17858|mmu:54131|mmu:11652|mmu:100037258|mmu:18750|mmu:12702|mmu:66679|mmu:18036|mmu:21933|mmu:20293|mmu:21926|mmu:16476|mmu:21898|mmu:16193|mmu:266632|mmu:117198|mmu:21937|mmu:11465…	15979|246727|23960|217069|18035|15945|19106|230073|18854|16647|16391|26400|15976|77125|269966|19697|15894|20846|17874|15463|15511|17858|54131|11652|100037258|18750|12702|66679|18036|21933|20293|21926|16476|21898|16193|266632|117198|21937|11465|81489|170743|246730|16175|16176|11461|193740|71586|20304|12362|20296|18550|54123|18033|16452|246728|216799|320207|58185|20847|26416|15975|26397|13665|14102|	http://www.genome.jp/kegg-bin/show_pathway?mmu05164/mmu:217069%09red/mmu:23960%09red/mmu:320207%09red/mmu:16391%09red/mmu:13665%09red/mmu:15976%09red/mmu:26400%09red/mmu:18854%09red/mmu:15975%09red/mmu:19697%09red/mmu:18036%09red/mmu:246727%09red/mmu:246728%09red/mmu:16193%09red/mmu:71586%09red/mmu:21926%09red/mmu:15979%09red/mmu:58185%09red/mmu:11461%09red/mmu:19106%09red/mmu:18033%09red/mmu:180…
Measles	KEGG PATHWAY	mmu05162	54	137	4.91106e-05	0.00217724	ENSMUSG00000020009|ENSMUSG00000032661|ENSMUSG00000034165|ENSMUSG00000066861|ENSMUSG00000026656|ENSMUSG00000024079|ENSMUSG00000002325|ENSMUSG00000031207|ENSMUSG00000059552|ENSMUSG00000004056|ENSMUSG00000031304|ENSMUSG00000024927|ENSMUSG00000026104|ENSMUSG00000032508|ENSMUSG00000090877|ENSMUSG00000023341|ENSMUSG00000003184|ENSMUSG00000031805|ENSMUSG00000070348|ENSMUSG00000022971|ENSMUSG00000030595|…	mmu:15979|mmu:246727|mmu:12445|mmu:23960|mmu:14130|mmu:19106|mmu:16391|mmu:17698|mmu:22059|mmu:11652|mmu:16186|mmu:19697|mmu:20846|mmu:17874|mmu:15511|mmu:17858|mmu:54131|mmu:16453|mmu:12443|mmu:15976|mmu:18036|mmu:21933|mmu:18035|mmu:246730|mmu:71586|mmu:21898|mmu:12571|mmu:14694|mmu:16193|mmu:266632|mmu:13000|mmu:16452|mmu:170743|mmu:16175|mmu:16176|mmu:208650|mmu:193740|mmu:12444|mmu:12675|mmu…	15979|246727|12445|23960|14130|19106|16391|17698|22059|11652|16186|19697|20846|17874|15511|17858|54131|16453|12443|15976|18036|21933|18035|246730|71586|21898|12571|14694|16193|266632|13000|16452|170743|16175|16176|208650|193740|12444|12675|13448|320207|20850|20848|18033|230073|246728|54123|20847|12567|15975|13665|24088|14102|21929|	http://www.genome.jp/kegg-bin/show_pathway?mmu05162/mmu:12571%09red/mmu:18033%09red/mmu:14130%09red/mmu:16391%09red/mmu:13448%09red/mmu:12443%09red/mmu:15976%09red/mmu:208650%09red/mmu:21929%09red/mmu:19697%09red/mmu:246727%09red/mmu:246728%09red/mmu:12675%09red/mmu:16193%09red/mmu:71586%09red/mmu:15979%09red/mmu:19106%09red/mmu:320207%09red/mmu:18035%09red/mmu:18036%09red/mmu:54131%09red/mmu:208…
Leishmaniasis	KEGG PATHWAY	mmu05140	32	65	7.26822e-05	0.00271747	ENSMUSG00000020009|ENSMUSG00000059498|ENSMUSG00000032487|ENSMUSG00000059089|ENSMUSG00000047945|ENSMUSG00000020826|ENSMUSG00000006519|ENSMUSG00000024927|ENSMUSG00000032508|ENSMUSG00000015947|ENSMUSG00000030595|ENSMUSG00000026104|ENSMUSG00000021025|ENSMUSG00000024401|ENSMUSG00000052684|ENSMUSG00000021250|ENSMUSG00000071715|ENSMUSG00000026480|ENSMUSG00000030786|ENSMUSG00000021253|ENSMUSG00000025809|…	mmu:15979|mmu:14131|mmu:19225|mmu:246256|mmu:17357|mmu:18126|mmu:13057|mmu:19697|mmu:17874|mmu:14129|mmu:18036|mmu:20846|mmu:18035|mmu:21926|mmu:16476|mmu:14281|mmu:17972|mmu:17970|mmu:16409|mmu:21809|mmu:16412|mmu:266632|mmu:21808|mmu:16452|mmu:16175|mmu:16176|mmu:16414|mmu:24088|mmu:18033|mmu:26416|mmu:17969|mmu:21898|	15979|14131|19225|246256|17357|18126|13057|19697|17874|14129|18036|20846|18035|21926|16476|14281|17972|17970|16409|21809|16412|266632|21808|16452|16175|16176|16414|24088|18033|26416|17969|21898|	http://www.genome.jp/kegg-bin/show_pathway?mmu05140/mmu:14131%09red/mmu:16409%09red/mmu:21809%09red/mmu:21808%09red/mmu:19697%09red/mmu:21926%09red/mmu:15979%09red/mmu:26416%09red/mmu:18033%09red/mmu:18035%09red/mmu:18036%09red/mmu:17970%09red/mmu:17972%09red/mmu:19225%09red/mmu:20846%09red/mmu:18126%09red/mmu:17874%09red/mmu:16452%09red/mmu:16476%09red/mmu:16412%09red/mmu:16414%09red/mmu:16175%0…
Focal adhesion	KEGG PATHWAY	mmu04510	72	207	8.5498e-05	0.00271747	ENSMUSG00000022836|ENSMUSG00000034165|ENSMUSG00000103439|ENSMUSG00000033220|ENSMUSG00000022438|ENSMUSG00000027111|ENSMUSG00000028364|ENSMUSG00000001930|ENSMUSG00000025856|ENSMUSG00000068699|ENSMUSG00000026509|ENSMUSG00000027087|ENSMUSG00000028864|ENSMUSG00000026193|ENSMUSG00000029304|ENSMUSG00000004056|ENSMUSG00000052681|ENSMUSG00000030403|ENSMUSG00000024290|ENSMUSG00000029860|ENSMUSG00000026479|…	mmu:107589|mmu:12445|mmu:11796|mmu:19354|mmu:170736|mmu:16403|mmu:21923|mmu:22371|mmu:18590|mmu:68794|mmu:12334|mmu:16410|mmu:15234|mmu:14268|mmu:20750|mmu:11652|mmu:215449|mmu:22323|mmu:19877|mmu:22793|mmu:16782|mmu:16398|mmu:226519|mmu:16777|mmu:16399|mmu:18591|mmu:18596|mmu:14254|mmu:109700|mmu:109711|mmu:18750|mmu:12443|mmu:16001|mmu:22330|mmu:21826|mmu:12444|mmu:21828|mmu:16775|mmu:16776|mmu…	107589|12445|11796|19354|170736|16403|21923|22371|18590|68794|12334|16410|15234|14268|20750|11652|215449|22323|19877|22793|16782|16398|226519|16777|16399|18591|18596|14254|109700|109711|18750|12443|16001|22330|21826|12444|21828|16775|16776|67268|60595|22324|16402|16412|16476|14257|11465|18654|53867|11461|21894|17295|16542|320910|224105|330662|21825|320207|12824|12043|192176|12827|12826|98932|1987…	http://www.genome.jp/kegg-bin/show_pathway?mmu04510/mmu:224105%09red/mmu:16775%09red/mmu:22330%09red/mmu:16776%09red/mmu:16542%09red/mmu:12334%09red/mmu:15234%09red/mmu:22371%09red/mmu:16403%09red/mmu:16402%09red/mmu:16399%09red/mmu:16398%09red/mmu:18591%09red/mmu:12043%09red/mmu:11796%09red/mmu:21923%09red/mmu:21826%09red/mmu:21825%09red/mmu:12390%09red/mmu:170736%09red/mmu:13866%09red/mmu:22793…
Salmonella infection	KEGG PATHWAY	mmu05132	36	79	9.19443e-05	0.00271747	ENSMUSG00000020009|ENSMUSG00000024290|ENSMUSG00000006304|ENSMUSG00000029380|ENSMUSG00000068699|ENSMUSG00000020826|ENSMUSG00000052684|ENSMUSG00000024927|ENSMUSG00000029622|ENSMUSG00000029621|ENSMUSG00000032508|ENSMUSG00000018293|ENSMUSG00000079426|ENSMUSG00000004591|ENSMUSG00000039005|ENSMUSG00000029465|ENSMUSG00000021250|ENSMUSG00000028868|ENSMUSG00000058427|ENSMUSG00000062825|ENSMUSG00000029379|…	mmu:15979|mmu:19877|mmu:76709|mmu:14825|mmu:68794|mmu:18126|mmu:16476|mmu:19697|mmu:11867|mmu:56443|mmu:17874|mmu:18643|mmu:68089|mmu:109333|mmu:21898|mmu:56378|mmu:14281|mmu:242687|mmu:20310|mmu:11465|mmu:330122|mmu:67771|mmu:16175|mmu:16176|mmu:11461|mmu:21872|mmu:20302|mmu:12362|mmu:12475|mmu:192176|mmu:18033|mmu:434782|mmu:26416|mmu:16193|mmu:20303|mmu:19878|	15979|19877|76709|14825|68794|18126|16476|19697|11867|56443|17874|18643|68089|109333|21898|56378|14281|242687|20310|11465|330122|67771|16175|16176|11461|21872|20302|12362|12475|192176|18033|434782|26416|16193|20303|19878|	http://www.genome.jp/kegg-bin/show_pathway?mmu05132/mmu:21872%09red/mmu:68089%09red/mmu:18643%09red/mmu:19697%09red/mmu:192176%09red/mmu:109333%09red/mmu:16193%09red/mmu:15979%09red/mmu:26416%09red/mmu:68794%09red/mmu:18033%09red/mmu:21898%09red/mmu:12475%09red/mmu:20310%09red/mmu:76709%09red/mmu:19877%09red/mmu:18126%09red/mmu:19878%09red/mmu:17874%09red/mmu:16476%09red/mmu:14825%09red/mmu:33012…
Apoptosis	KEGG PATHWAY	mmu04210	35	82	0.000305525	0.00752037	ENSMUSG00000103439|ENSMUSG00000025887|ENSMUSG00000059552|ENSMUSG00000024927|ENSMUSG00000026029|ENSMUSG00000032508|ENSMUSG00000004056|ENSMUSG00000022074|ENSMUSG00000021025|ENSMUSG00000024401|ENSMUSG00000020227|ENSMUSG00000071714|ENSMUSG00000021408|ENSMUSG00000059883|ENSMUSG00000030341|ENSMUSG00000022514|ENSMUSG00000026509|ENSMUSG00000071713|ENSMUSG00000027399|ENSMUSG00000027398|ENSMUSG00000022092|…	mmu:11796|mmu:12364|mmu:22059|mmu:19697|mmu:12370|mmu:17874|mmu:11652|mmu:21933|mmu:18035|mmu:21926|mmu:73914|mmu:12983|mmu:19766|mmu:266632|mmu:21937|mmu:16180|mmu:12334|mmu:12983|mmu:16175|mmu:16176|mmu:19057|mmu:12675|mmu:320207|mmu:12043|mmu:18033|mmu:19108|mmu:18049|mmu:11797|mmu:12633|mmu:11796|mmu:53859|mmu:108960|mmu:12048|mmu:16177|mmu:14102|	11796|12364|22059|19697|12370|17874|11652|21933|18035|21926|73914|12983|19766|266632|21937|16180|12334|12983|16175|16176|19057|12675|320207|12043|18033|19108|18049|11797|12633|11796|53859|108960|12048|16177|14102|	http://www.genome.jp/kegg-bin/show_pathway?mmu04210/mmu:18033%09red/mmu:108960%09red/mmu:12043%09red/mmu:12334%09red/mmu:12370%09red/mmu:12048%09red/mmu:19697%09red/mmu:12675%09red/mmu:21926%09red/mmu:21933%09red/mmu:73914%09red/mmu:12633%09red/mmu:320207%09red/mmu:18035%09red/mmu:19057%09red/mmu:17874%09red/mmu:14102%09red/mmu:16176%09red/mmu:12983%09red/mmu:19108%09red/mmu:11652%09red/mmu:12364…
Leukocyte transendothelial migration	KEGG PATHWAY	mmu04670	46	121	0.000325732	0.00752037	ENSMUSG00000024290|ENSMUSG00000020717|ENSMUSG00000052397|ENSMUSG00000022469|ENSMUSG00000031207|ENSMUSG00000029204|ENSMUSG00000052681|ENSMUSG00000053436|ENSMUSG00000030403|ENSMUSG00000006519|ENSMUSG00000037405|ENSMUSG00000041378|ENSMUSG00000066058|ENSMUSG00000061353|ENSMUSG00000000001|ENSMUSG00000050965|ENSMUSG00000054892|ENSMUSG00000021823|ENSMUSG00000037815|ENSMUSG00000015143|ENSMUSG00000071715|…	mmu:19877|mmu:18613|mmu:22350|mmu:223864|mmu:17698|mmu:74734|mmu:215449|mmu:26416|mmu:22323|mmu:13057|mmu:15894|mmu:12741|mmu:242653|mmu:20315|mmu:14679|mmu:18750|mmu:22165|mmu:22330|mmu:12385|mmu:109711|mmu:17972|mmu:67268|mmu:69524|mmu:60595|mmu:22324|mmu:17970|mmu:16409|mmu:16412|mmu:13058|mmu:11465|mmu:56173|mmu:11461|mmu:19247|mmu:16408|mmu:16414|mmu:19354|mmu:19229|mmu:98932|mmu:12388|mmu:3…	19877|18613|22350|223864|17698|74734|215449|26416|22323|13057|15894|12741|242653|20315|14679|18750|22165|22330|12385|109711|17972|67268|69524|60595|22324|17970|16409|16412|13058|11465|56173|11461|19247|16408|16414|19354|19229|98932|12388|320207|60363|17969|234779|18260|19878|12562|	http://www.genome.jp/kegg-bin/show_pathway?mmu04670/mmu:22350%09red/mmu:242653%09red/mmu:215449%09red/mmu:16409%09red/mmu:16408%09red/mmu:56173%09red/mmu:26416%09red/mmu:19247%09red/mmu:22330%09red/mmu:12562%09red/mmu:74734%09red/mmu:320207%09red/mmu:17970%09red/mmu:17972%09red/mmu:19877%09red/mmu:20315%09red/mmu:223864%09red/mmu:19229%09red/mmu:69524%09red/mmu:22324%09red/mmu:16412%09red/mmu:164…
Pathways in cancer	KEGG PATHWAY	mmu05200	98	323	0.000359469	0.00752037	ENSMUSG00000103439|ENSMUSG00000006005|ENSMUSG00000025856|ENSMUSG00000059552|ENSMUSG00000034957|ENSMUSG00000002250|ENSMUSG00000004056|ENSMUSG00000070348|ENSMUSG00000019966|ENSMUSG00000021109|ENSMUSG00000041075|ENSMUSG00000019846|ENSMUSG00000027940|ENSMUSG00000037815|ENSMUSG00000039239|ENSMUSG00000020184|ENSMUSG00000000489|ENSMUSG00000085505|ENSMUSG00000025199|ENSMUSG00000057367|ENSMUSG00000023067|…	mmu:11796|mmu:108989|mmu:18590|mmu:22059|mmu:12606|mmu:19015|mmu:11652|mmu:12443|mmu:17311|mmu:15251|mmu:14369|mmu:16775|mmu:59069|mmu:12385|mmu:21808|mmu:17246|mmu:18591|mmu:20525|mmu:12675|mmu:11797|mmu:12575|mmu:12826|mmu:12156|mmu:234779|mmu:14102|mmu:22419|mmu:19730|mmu:19401|mmu:12827|mmu:18854|mmu:14182|mmu:20525|mmu:12402|mmu:12370|mmu:17127|mmu:14370|mmu:16410|mmu:110279|mmu:16653|mmu:18…	11796|108989|18590|22059|12606|19015|11652|12443|17311|15251|14369|16775|59069|12385|21808|17246|18591|20525|12675|11797|12575|12826|12156|234779|14102|22419|19730|19401|12827|18854|14182|20525|12402|12370|17127|14370|16410|110279|16653|18654|208650|12550|11796|17295|20375|235320|14268|18126|56289|18596|15234|19225|18034|18035|16776|21809|16412|76551|56458|16777|320207|12043|13866|12567|14013|141…	http://www.genome.jp/kegg-bin/show_pathway?mmu05200/mmu:16775%09red/mmu:14013%09red/mmu:16777%09red/mmu:16776%09red/mmu:19730%09red/mmu:18854%09red/mmu:19697%09red/mmu:21813%09red/mmu:64143%09red/mmu:13866%09red/mmu:14369%09red/mmu:14366%09red/mmu:12827%09red/mmu:12826%09red/mmu:15251%09red/mmu:76551%09red/mmu:22419%09red/mmu:17869%09red/mmu:16842%09red/mmu:56289%09red/mmu:19354%09red/mmu:16476%0…
Transcriptional misregulation in cancer	KEGG PATHWAY	mmu05202	61	178	0.000387709	0.00752037	ENSMUSG00000099974|ENSMUSG00000009376|ENSMUSG00000016087|ENSMUSG00000103439|ENSMUSG00000002111|ENSMUSG00000037992|ENSMUSG00000023067|ENSMUSG00000025856|ENSMUSG00000066687|ENSMUSG00000036986|ENSMUSG00000059552|ENSMUSG00000022508|ENSMUSG00000025746|ENSMUSG00000056501|ENSMUSG00000028341|ENSMUSG00000031613|ENSMUSG00000011960|ENSMUSG00000005533|ENSMUSG00000059436|ENSMUSG00000024927|ENSMUSG00000022200|…	mmu:12047|mmu:17295|mmu:14247|mmu:11796|mmu:20375|mmu:19401|mmu:12575|mmu:18590|mmu:235320|mmu:18854|mmu:22059|mmu:12053|mmu:16193|mmu:12608|mmu:18124|mmu:15446|mmu:12455|mmu:16001|mmu:17187|mmu:19697|mmu:66629|mmu:17869|mmu:17392|mmu:21813|mmu:20732|mmu:14254|mmu:18791|mmu:13714|mmu:14129|mmu:67603|mmu:12394|mmu:12045|mmu:80859|mmu:56458|mmu:12606|mmu:140780|mmu:12524|mmu:16409|mmu:19696|mmu:187…	12047|17295|14247|11796|20375|19401|12575|18590|235320|18854|22059|12053|16193|12608|18124|15446|12455|16001|17187|19697|66629|17869|17392|21813|20732|14254|18791|13714|14129|67603|12394|12045|80859|56458|12606|140780|12524|16409|19696|18792|15078|16009|17246|15078|17355|17125|12444|56312|13876|14011|15364|12475|18033|12044|11908|11796|15902|12048|13714|16178|108829|	http://www.genome.jp/kegg-bin/show_pathway?mmu05202/mmu:15446%09red/mmu:12048%09red/mmu:108829%09red/mmu:16409%09red/mmu:14011%09red/mmu:15364%09red/mmu:12047%09red/mmu:12045%09red/mmu:12044%09red/mmu:18854%09red/mmu:19697%09red/mmu:19696%09red/mmu:16193%09red/mmu:12475%09red/mmu:12394%09red/mmu:56458%09red/mmu:20375%09red/mmu:14247%09red/mmu:12575%09red/mmu:235320%09red/mmu:18033%09red/mmu:13714…
Toll-like receptor signaling pathway	KEGG PATHWAY	mmu04620	40	101	0.000404094	0.00752037	ENSMUSG00000029771|ENSMUSG00000040522|ENSMUSG00000029304|ENSMUSG00000025139|ENSMUSG00000002948|ENSMUSG00000052684|ENSMUSG00000024927|ENSMUSG00000026029|ENSMUSG00000032508|ENSMUSG00000003184|ENSMUSG00000004056|ENSMUSG00000051439|ENSMUSG00000024235|ENSMUSG00000022971|ENSMUSG00000026104|ENSMUSG00000021025|ENSMUSG00000024401|ENSMUSG00000039005|ENSMUSG00000035042|ENSMUSG00000059883|ENSMUSG00000025746|…	mmu:27056|mmu:170744|mmu:20750|mmu:54473|mmu:26400|mmu:16476|mmu:19697|mmu:12370|mmu:17874|mmu:54131|mmu:11652|mmu:12475|mmu:26410|mmu:15976|mmu:20846|mmu:18035|mmu:21926|mmu:21898|mmu:20304|mmu:266632|mmu:16193|mmu:12524|mmu:14281|mmu:21899|mmu:19766|mmu:170743|mmu:15945|mmu:16176|mmu:12675|mmu:20302|mmu:320207|mmu:24088|mmu:21897|mmu:18033|mmu:54123|mmu:26416|mmu:15975|mmu:26397|mmu:20303|mmu:1…	27056|170744|20750|54473|26400|16476|19697|12370|17874|54131|11652|12475|26410|15976|20846|18035|21926|21898|20304|266632|16193|12524|14281|21899|19766|170743|15945|16176|12675|20302|320207|24088|21897|18033|54123|26416|15975|26397|20303|117149|	http://www.genome.jp/kegg-bin/show_pathway?mmu04620/mmu:18033%09red/mmu:15976%09red/mmu:12370%09red/mmu:15975%09red/mmu:19697%09red/mmu:12675%09red/mmu:16193%09red/mmu:21926%09red/mmu:26416%09red/mmu:20750%09red/mmu:26410%09red/mmu:320207%09red/mmu:18035%09red/mmu:12475%09red/mmu:54131%09red/mmu:20302%09red/mmu:20846%09red/mmu:117149%09red/mmu:17874%09red/mmu:20304%09red/mmu:16476%09red/mmu:21897…
Hepatitis B	KEGG PATHWAY	mmu05161	52	145	0.000430527	0.00752037	ENSMUSG00000040033|ENSMUSG00000028163|ENSMUSG00000025958|ENSMUSG00000059552|ENSMUSG00000025887|ENSMUSG00000028763|ENSMUSG00000033016|ENSMUSG00000052684|ENSMUSG00000024927|ENSMUSG00000026029|ENSMUSG00000032508|ENSMUSG00000022346|ENSMUSG00000027230|ENSMUSG00000003184|ENSMUSG00000004056|ENSMUSG00000050965|ENSMUSG00000070348|ENSMUSG00000038648|ENSMUSG00000026104|ENSMUSG00000021025|ENSMUSG00000022285|…	mmu:20847|mmu:18033|mmu:12912|mmu:22059|mmu:12364|mmu:15530|mmu:18018|mmu:16476|mmu:19697|mmu:12370|mmu:17874|mmu:17869|mmu:26427|mmu:54131|mmu:11652|mmu:18750|mmu:12443|mmu:208647|mmu:20846|mmu:18035|mmu:22631|mmu:20852|mmu:21898|mmu:12571|mmu:13655|mmu:16193|mmu:16653|mmu:21809|mmu:14281|mmu:21808|mmu:21926|mmu:12043|mmu:71586|mmu:12675|mmu:11911|mmu:18021|mmu:18176|mmu:54123|mmu:20850|mmu:2408…	20847|18033|12912|22059|12364|15530|18018|16476|19697|12370|17874|17869|26427|54131|11652|18750|12443|208647|20846|18035|22631|20852|21898|12571|13655|16193|16653|21809|14281|21808|21926|12043|71586|12675|11911|18021|18176|54123|20850|24088|12575|230073|320207|18538|12567|15975|19229|117149|19645|20848|14102|54401|	http://www.genome.jp/kegg-bin/show_pathway?mmu05161/mmu:16653%09red/mmu:12571%09red/mmu:320207%09red/mmu:208647%09red/mmu:12575%09red/mmu:12912%09red/mmu:12364%09red/mmu:21809%09red/mmu:12370%09red/mmu:15975%09red/mmu:19697%09red/mmu:12675%09red/mmu:16193%09red/mmu:71586%09red/mmu:21926%09red/mmu:22631%09red/mmu:18033%09red/mmu:18035%09red/mmu:54131%09red/mmu:12043%09red/mmu:13655%09red/mmu:20848…
Ribosome biogenesis in eukaryotes	KEGG PATHWAY	mmu03008	34	81	0.000468997	0.00752037	ENSMUSG00000027405|ENSMUSG00000027787|ENSMUSG00000029430|ENSMUSG00000030138|ENSMUSG00000032834|ENSMUSG00000041438|ENSMUSG00000033285|ENSMUSG00000030521|ENSMUSG00000025337|ENSMUSG00000028869|ENSMUSG00000004268|ENSMUSG00000026020|ENSMUSG00000038299|ENSMUSG00000026127|ENSMUSG00000018040|ENSMUSG00000032288|ENSMUSG00000027722|ENSMUSG00000035575|ENSMUSG00000021149|ENSMUSG00000041057|ENSMUSG00000054079|…	mmu:67134|mmu:97112|mmu:19384|mmu:213895|mmu:110816|mmu:21771|mmu:269470|mmu:67973|mmu:66711|mmu:230737|mmu:14791|mmu:55989|mmu:225348|mmu:27993|mmu:74778|mmu:102462|mmu:57815|mmu:216987|mmu:69237|mmu:72515|mmu:217109|mmu:67619|mmu:67724|mmu:13000|mmu:68147|mmu:224092|mmu:59028|mmu:245474|mmu:30877|mmu:217995|mmu:52530|mmu:21453|mmu:16418|mmu:20826|	67134|97112|19384|213895|110816|21771|269470|67973|66711|230737|14791|55989|225348|27993|74778|102462|57815|216987|69237|72515|217109|67619|67724|13000|68147|224092|59028|245474|30877|217995|52530|21453|16418|20826|	http://www.genome.jp/kegg-bin/show_pathway?mmu03008/mmu:230737%09red/mmu:217109%09red/mmu:67619%09red/mmu:213895%09red/mmu:102462%09red/mmu:66711%09red/mmu:68147%09red/mmu:21771%09red/mmu:69237%09red/mmu:30877%09red/mmu:72515%09red/mmu:13000%09red/mmu:74778%09red/mmu:245474%09red/mmu:20826%09red/mmu:67134%09red/mmu:52530%09red/mmu:269470%09red/mmu:16418%09red/mmu:225348%09red/mmu:27993%09red/mmu:…
Toxoplasmosis	KEGG PATHWAY	mmu05145	43	113	0.000491866	0.00752037	ENSMUSG00000020009|ENSMUSG00000103439|ENSMUSG00000020826|ENSMUSG00000053436|ENSMUSG00000024927|ENSMUSG00000004040|ENSMUSG00000026479|ENSMUSG00000026478|ENSMUSG00000026029|ENSMUSG00000032508|ENSMUSG00000090877|ENSMUSG00000000001|ENSMUSG00000002900|ENSMUSG00000004056|ENSMUSG00000038037|ENSMUSG00000015647|ENSMUSG00000030595|ENSMUSG00000026104|ENSMUSG00000021025|ENSMUSG00000024401|ENSMUSG00000027111|…	mmu:15979|mmu:11796|mmu:18126|mmu:26416|mmu:19697|mmu:20848|mmu:16782|mmu:226519|mmu:12370|mmu:17874|mmu:15511|mmu:14679|mmu:16777|mmu:11652|mmu:12703|mmu:16776|mmu:18036|mmu:20846|mmu:18035|mmu:21926|mmu:16403|mmu:21898|mmu:12043|mmu:105675|mmu:21809|mmu:16412|mmu:266632|mmu:21808|mmu:21937|mmu:16145|mmu:16452|mmu:193740|mmu:12675|mmu:320207|mmu:24088|mmu:18033|mmu:11797|mmu:11796|mmu:16775|mmu:…	15979|11796|18126|26416|19697|20848|16782|226519|12370|17874|15511|14679|16777|11652|12703|16776|18036|20846|18035|21926|16403|21898|12043|105675|21809|16412|266632|21808|21937|16145|16452|193740|12675|320207|24088|18033|11797|11796|16775|12048|16155|26397|12774|	http://www.genome.jp/kegg-bin/show_pathway?mmu05145/mmu:320207%09red/mmu:16775%09red/mmu:16777%09red/mmu:16776%09red/mmu:12043%09red/mmu:105675%09red/mmu:16403%09red/mmu:21809%09red/mmu:12370%09red/mmu:12048%09red/mmu:19697%09red/mmu:12675%09red/mmu:21926%09red/mmu:15979%09red/mmu:12774%09red/mmu:18033%09red/mmu:18035%09red/mmu:18036%09red/mmu:20848%09red/mmu:20846%09red/mmu:16145%09red/mmu:17874…
Legionellosis	KEGG PATHWAY	mmu05134	27	58	0.000508897	0.00752037	ENSMUSG00000029380|ENSMUSG00000091549|ENSMUSG00000024927|ENSMUSG00000026029|ENSMUSG00000032508|ENSMUSG00000090877|ENSMUSG00000025225|ENSMUSG00000021025|ENSMUSG00000024401|ENSMUSG00000039005|ENSMUSG00000030786|ENSMUSG00000058427|ENSMUSG00000020088|ENSMUSG00000029379|ENSMUSG00000027398|ENSMUSG00000091971|ENSMUSG00000083327|ENSMUSG00000071644|ENSMUSG00000025980|ENSMUSG00000025888|ENSMUSG00000078945|…	mmu:14825|mmu:13627|mmu:19697|mmu:12370|mmu:17874|mmu:15511|mmu:18034|mmu:18035|mmu:21926|mmu:21898|mmu:16409|mmu:20310|mmu:20224|mmu:330122|mmu:16176|mmu:193740|mmu:269523|mmu:67160|mmu:15510|mmu:12362|mmu:17948|mmu:16414|mmu:12475|mmu:24088|mmu:18033|mmu:13627|mmu:16193|	14825|13627|19697|12370|17874|15511|18034|18035|21926|21898|16409|20310|20224|330122|16176|193740|269523|67160|15510|12362|17948|16414|12475|24088|18033|13627|16193|	http://www.genome.jp/kegg-bin/show_pathway?mmu05134/mmu:67160%09red/mmu:16409%09red/mmu:12370%09red/mmu:269523%09red/mmu:19697%09red/mmu:16193%09red/mmu:21926%09red/mmu:18033%09red/mmu:18034%09red/mmu:18035%09red/mmu:12475%09red/mmu:20310%09red/mmu:21898%09red/mmu:17874%09red/mmu:16176%09red/mmu:193740%09red/mmu:16414%09red/mmu:14825%09red/mmu:330122%09red/mmu:12362%09red/mmu:24088%09red/mmu:1362…
Cytokine-cytokine receptor interaction	KEGG PATHWAY	mmu04060	82	264	0.000584108	0.00817751	ENSMUSG00000038067|ENSMUSG00000020009|ENSMUSG00000030339|ENSMUSG00000032440|ENSMUSG00000035042|ENSMUSG00000021756|ENSMUSG00000020357|ENSMUSG00000023905|ENSMUSG00000034855|ENSMUSG00000025856|ENSMUSG00000028362|ENSMUSG00000002897|ENSMUSG00000019122|ENSMUSG00000058755|ENSMUSG00000022971|ENSMUSG00000016524|ENSMUSG00000005824|ENSMUSG00000005672|ENSMUSG00000031779|ENSMUSG00000026068|ENSMUSG00000044337|…	mmu:12985|mmu:15979|mmu:17000|mmu:21813|mmu:20304|mmu:16195|mmu:14257|mmu:27279|mmu:15945|mmu:18590|mmu:21949|mmu:16172|mmu:20308|mmu:18413|mmu:15976|mmu:329244|mmu:50930|mmu:16590|mmu:20299|mmu:16174|mmu:12778|mmu:18383|mmu:20315|mmu:20311|mmu:18591|mmu:12768|mmu:18596|mmu:14254|mmu:15234|mmu:16186|mmu:21943|mmu:20305|mmu:16880|mmu:17311|mmu:21933|mmu:20293|mmu:21926|mmu:20292|mmu:12983|mmu:2030…	12985|15979|17000|21813|20304|16195|14257|27279|15945|18590|21949|16172|20308|18413|15976|329244|50930|16590|20299|16174|12778|18383|20315|20311|18591|12768|18596|14254|15234|16186|21943|20305|16880|17311|21933|20293|21926|20292|12983|20306|16878|16194|16193|20302|21809|12772|21808|11477|20310|21937|16180|16190|12983|16175|16176|12765|17295|16542|56744|57349|21942|21950|12145|16156|12977|245527|1…	http://www.genome.jp/kegg-bin/show_pathway?mmu04060/mmu:17311%09red/mmu:21949%09red/mmu:57349%09red/mmu:15234%09red/mmu:16542%09red/mmu:12778%09red/mmu:21942%09red/mmu:21943%09red/mmu:21809%09red/mmu:21808%09red/mmu:15975%09red/mmu:21813%09red/mmu:11477%09red/mmu:16190%09red/mmu:16193%09red/mmu:21926%09red/mmu:16180%09red/mmu:16174%09red/mmu:12145%09red/mmu:12774%09red/mmu:20315%09red/mmu:20299%0…
PI3K-Akt signaling pathway	KEGG PATHWAY	mmu04151	103	351	0.000676191	0.00899334	ENSMUSG00000025856|ENSMUSG00000043154|ENSMUSG00000027381|ENSMUSG00000059552|ENSMUSG00000031465|ENSMUSG00000004591|ENSMUSG00000042284|ENSMUSG00000004056|ENSMUSG00000041769|ENSMUSG00000070348|ENSMUSG00000019966|ENSMUSG00000023885|ENSMUSG00000025915|ENSMUSG00000019846|ENSMUSG00000038612|ENSMUSG00000027947|ENSMUSG00000020184|ENSMUSG00000000489|ENSMUSG00000006445|ENSMUSG00000025321|ENSMUSG00000025199|…	mmu:18590|mmu:235542|mmu:12125|mmu:22059|mmu:11601|mmu:109333|mmu:109700|mmu:11652|mmu:52432|mmu:12443|mmu:17311|mmu:21826|mmu:170755|mmu:16775|mmu:17210|mmu:16194|mmu:17246|mmu:18591|mmu:13836|mmu:320910|mmu:12675|mmu:21825|mmu:12977|mmu:12824|mmu:12827|mmu:12826|mmu:26987|mmu:74747|mmu:12575|mmu:13636|mmu:20750|mmu:14182|mmu:16402|mmu:18033|mmu:16453|mmu:16410|mmu:13684|mmu:16653|mmu:13685|mmu:…	18590|235542|12125|22059|11601|109333|109700|11652|52432|12443|17311|21826|170755|16775|17210|16194|17246|18591|13836|320910|12675|21825|12977|12824|12827|12826|26987|74747|12575|13636|20750|14182|16402|18033|16453|16410|13684|16653|13685|14257|18654|53867|14701|11911|16452|18414|20104|12985|17295|12445|12912|20963|83490|14268|16186|54401|26427|18596|15234|15976|15370|18127|22631|16776|16412|1677…	http://www.genome.jp/kegg-bin/show_pathway?mmu04151/mmu:13684%09red/mmu:13685%09red/mmu:16775%09red/mmu:16777%09red/mmu:16776%09red/mmu:235542%09red/mmu:15975%09red/mmu:19697%09red/mmu:109333%09red/mmu:21923%09red/mmu:12824%09red/mmu:12827%09red/mmu:12826%09red/mmu:14701%09red/mmu:52432%09red/mmu:14254%09red/mmu:15976%09red/mmu:14257%09red/mmu:20104%09red/mmu:74747%09red/mmu:17869%09red/mmu:20750…
Bacterial invasion of epithelial cells	KEGG PATHWAY	mmu05100	32	77	0.000773844	0.00980202	ENSMUSG00000041112|ENSMUSG00000022831|ENSMUSG00000009376|ENSMUSG00000026193|ENSMUSG00000036885|ENSMUSG00000022637|ENSMUSG00000059248|ENSMUSG00000058325|ENSMUSG00000034342|ENSMUSG00000000555|ENSMUSG00000029621|ENSMUSG00000033335|ENSMUSG00000079426|ENSMUSG00000006304|ENSMUSG00000021823|ENSMUSG00000037815|ENSMUSG00000029622|ENSMUSG00000029465|ENSMUSG00000025809|ENSMUSG00000028868|ENSMUSG00000062825|…	mmu:140580|mmu:15163|mmu:17295|mmu:14268|mmu:622434|mmu:208650|mmu:53860|mmu:330662|mmu:12402|mmu:16402|mmu:56443|mmu:13430|mmu:68089|mmu:76709|mmu:22330|mmu:12385|mmu:11867|mmu:56378|mmu:16412|mmu:242687|mmu:11465|mmu:52398|mmu:67771|mmu:11461|mmu:622434|mmu:13043|mmu:12550|mmu:320207|mmu:434782|mmu:16202|mmu:12390|mmu:271849|	140580|15163|17295|14268|622434|208650|53860|330662|12402|16402|56443|13430|68089|76709|22330|12385|11867|56378|16412|242687|11465|52398|67771|11461|622434|13043|12550|320207|434782|16202|12390|271849|	http://www.genome.jp/kegg-bin/show_pathway?mmu05100/mmu:434782%09red/mmu:22330%09red/mmu:68089%09red/mmu:16402%09red/mmu:208650%09red/mmu:67771%09red/mmu:15163%09red/mmu:12385%09red/mmu:12390%09red/mmu:140580%09red/mmu:14268%09red/mmu:320207%09red/mmu:622434%09red/mmu:13043%09red/mmu:16412%09red/mmu:13430%09red/mmu:52398%09red/mmu:330662%09red/mmu:12550%09red/mmu:11461%09red/mmu:11465%09red/mmu:1…
Pertussis	KEGG PATHWAY	mmu05133	31	74	0.000835754	0.010105	ENSMUSG00000027399|ENSMUSG00000055172|ENSMUSG00000020826|ENSMUSG00000052684|ENSMUSG00000024927|ENSMUSG00000000555|ENSMUSG00000032508|ENSMUSG00000000001|ENSMUSG00000003184|ENSMUSG00000083750|ENSMUSG00000024401|ENSMUSG00000036905|ENSMUSG00000021250|ENSMUSG00000039005|ENSMUSG00000018899|ENSMUSG00000030786|ENSMUSG00000025809|ENSMUSG00000059883|ENSMUSG00000062929|ENSMUSG00000027398|ENSMUSG00000029371|…	mmu:16175|mmu:50909|mmu:18126|mmu:16476|mmu:19697|mmu:16402|mmu:17874|mmu:14679|mmu:54131|mmu:12631|mmu:21926|mmu:12260|mmu:14281|mmu:21898|mmu:16362|mmu:16409|mmu:16412|mmu:266632|mmu:12632|mmu:16176|mmu:20311|mmu:12362|mmu:16414|mmu:12475|mmu:12268|mmu:18033|mmu:216799|mmu:26416|mmu:16193|mmu:15900|mmu:117149|	16175|50909|18126|16476|19697|16402|17874|14679|54131|12631|21926|12260|14281|21898|16362|16409|16412|266632|12632|16176|20311|12362|16414|12475|12268|18033|216799|26416|16193|15900|117149|	http://www.genome.jp/kegg-bin/show_pathway?mmu05133/mmu:16409%09red/mmu:16402%09red/mmu:19697%09red/mmu:50909%09red/mmu:16193%09red/mmu:21926%09red/mmu:12631%09red/mmu:12632%09red/mmu:18033%09red/mmu:12475%09red/mmu:54131%09red/mmu:20311%09red/mmu:117149%09red/mmu:15900%09red/mmu:17874%09red/mmu:16476%09red/mmu:16412%09red/mmu:16414%09red/mmu:26416%09red/mmu:21898%09red/mmu:14679%09red/mmu:14281%…
Proteoglycans in cancer	KEGG PATHWAY	mmu05205	66	205	0.000900551	0.0104151	ENSMUSG00000030170|ENSMUSG00000055723|ENSMUSG00000024290|ENSMUSG00000022831|ENSMUSG00000009376|ENSMUSG00000031207|ENSMUSG00000005087|ENSMUSG00000068699|ENSMUSG00000037225|ENSMUSG00000041075|ENSMUSG00000026193|ENSMUSG00000059552|ENSMUSG00000025351|ENSMUSG00000053436|ENSMUSG00000031565|ENSMUSG00000028763|ENSMUSG00000005533|ENSMUSG00000034342|ENSMUSG00000000555|ENSMUSG00000024486|ENSMUSG00000022346|…	mmu:22419|mmu:66922|mmu:19877|mmu:15163|mmu:17295|mmu:17698|mmu:12505|mmu:68794|mmu:14173|mmu:14369|mmu:14268|mmu:22059|mmu:12512|mmu:26416|mmu:14182|mmu:15530|mmu:16001|mmu:12402|mmu:16402|mmu:15200|mmu:17869|mmu:18793|mmu:15234|mmu:11652|mmu:18750|mmu:12443|mmu:19247|mmu:15251|mmu:12512|mmu:21926|mmu:14370|mmu:20969|mmu:16410|mmu:20848|mmu:22350|mmu:21898|mmu:16653|mmu:16412|mmu:18792|mmu:21808…	22419|66922|19877|15163|17295|17698|12505|68794|14173|14369|14268|22059|12512|26416|14182|15530|16001|12402|16402|15200|17869|18793|15234|11652|18750|12443|19247|15251|12512|21926|14370|20969|16410|20848|22350|21898|16653|16412|18792|21808|17246|11461|11465|29875|208650|16398|16542|13039|13043|18176|20130|21825|320207|24088|192176|12575|19108|19878|13866|74055|20104|234779|20971|12390|14102|14366|	http://www.genome.jp/kegg-bin/show_pathway?mmu05205/mmu:22350%09red/mmu:16653%09red/mmu:18176%09red/mmu:12575%09red/mmu:26416%09red/mmu:16542%09red/mmu:14173%09red/mmu:16402%09red/mmu:16398%09red/mmu:21808%09red/mmu:208650%09red/mmu:12512%09red/mmu:20130%09red/mmu:192176%09red/mmu:21825%09red/mmu:12390%09red/mmu:21926%09red/mmu:66922%09red/mmu:13866%09red/mmu:14369%09red/mmu:20971%09red/mmu:14268…
Chagas disease (American trypanosomiasis)	KEGG PATHWAY	mmu05142	39	103	0.000942018	0.0104407	ENSMUSG00000020009|ENSMUSG00000022052|ENSMUSG00000020826|ENSMUSG00000052684|ENSMUSG00000024927|ENSMUSG00000026029|ENSMUSG00000032508|ENSMUSG00000000001|ENSMUSG00000021070|ENSMUSG00000004056|ENSMUSG00000032058|ENSMUSG00000041769|ENSMUSG00000032402|ENSMUSG00000035352|ENSMUSG00000024401|ENSMUSG00000036905|ENSMUSG00000039005|ENSMUSG00000035042|ENSMUSG00000059883|ENSMUSG00000021253|ENSMUSG00000021250|…	mmu:15979|mmu:52432|mmu:18126|mmu:16476|mmu:19697|mmu:12370|mmu:17874|mmu:14679|mmu:12062|mmu:11652|mmu:73699|mmu:52432|mmu:17127|mmu:20293|mmu:21926|mmu:12260|mmu:21898|mmu:20304|mmu:266632|mmu:21809|mmu:14281|mmu:21899|mmu:21808|mmu:21937|mmu:18035|mmu:11421|mmu:16176|mmu:21813|mmu:12675|mmu:20302|mmu:320207|mmu:18787|mmu:18033|mmu:20296|mmu:12633|mmu:26416|mmu:16193|mmu:24088|mmu:14102|	15979|52432|18126|16476|19697|12370|17874|14679|12062|11652|73699|52432|17127|20293|21926|12260|21898|20304|266632|21809|14281|21899|21808|21937|18035|11421|16176|21813|12675|20302|320207|18787|18033|20296|12633|26416|16193|24088|14102|	http://www.genome.jp/kegg-bin/show_pathway?mmu05142/mmu:73699%09red/mmu:18033%09red/mmu:21809%09red/mmu:12370%09red/mmu:19697%09red/mmu:12062%09red/mmu:12675%09red/mmu:16193%09red/mmu:21926%09red/mmu:15979%09red/mmu:26416%09red/mmu:12633%09red/mmu:320207%09red/mmu:18035%09red/mmu:18787%09red/mmu:18126%09red/mmu:17874%09red/mmu:14102%09red/mmu:20304%09red/mmu:16476%09red/mmu:14679%09red/mmu:20296%…
NOD-like receptor signaling pathway	KEGG PATHWAY	mmu04621	26	58	0.00098801	0.0105124	ENSMUSG00000103439|ENSMUSG00000029380|ENSMUSG00000024927|ENSMUSG00000023348|ENSMUSG00000026029|ENSMUSG00000055994|ENSMUSG00000030595|ENSMUSG00000021025|ENSMUSG00000024401|ENSMUSG00000021709|ENSMUSG00000035042|ENSMUSG00000058427|ENSMUSG00000035352|ENSMUSG00000022534|ENSMUSG00000027398|ENSMUSG00000025199|ENSMUSG00000025888|ENSMUSG00000078945|ENSMUSG00000057367|ENSMUSG00000028163|ENSMUSG00000032691|…	mmu:11796|mmu:14825|mmu:19697|mmu:22051|mmu:12370|mmu:257632|mmu:18036|mmu:18035|mmu:21926|mmu:59079|mmu:20304|mmu:20310|mmu:20293|mmu:54483|mmu:16176|mmu:12675|mmu:12362|mmu:17948|mmu:11797|mmu:18033|mmu:216799|mmu:20296|mmu:11796|mmu:26416|mmu:16193|mmu:21929|	11796|14825|19697|22051|12370|257632|18036|18035|21926|59079|20304|20310|20293|54483|16176|12675|12362|17948|11797|18033|216799|20296|11796|26416|16193|21929|	http://www.genome.jp/kegg-bin/show_pathway?mmu04621/mmu:12370%09red/mmu:21929%09red/mmu:19697%09red/mmu:12675%09red/mmu:16193%09red/mmu:21926%09red/mmu:54483%09red/mmu:26416%09red/mmu:18033%09red/mmu:18035%09red/mmu:18036%09red/mmu:20310%09red/mmu:59079%09red/mmu:20304%09red/mmu:14825%09red/mmu:20296%09red/mmu:20293%09red/mmu:12362%09red/mmu:11796%09red/mmu:11797%09red/mmu:216799%09red/mmu:17948%…
MAPK signaling pathway	KEGG PATHWAY	mmu04010	77	253	0.00133713	0.0136799	ENSMUSG00000055723|ENSMUSG00000036390|ENSMUSG00000031902|ENSMUSG00000032577|ENSMUSG00000020190|ENSMUSG00000021453|ENSMUSG00000025856|ENSMUSG00000031309|ENSMUSG00000037225|ENSMUSG00000016528|ENSMUSG00000002948|ENSMUSG00000059552|ENSMUSG00000026436|ENSMUSG00000052681|ENSMUSG00000031565|ENSMUSG00000033016|ENSMUSG00000059436|ENSMUSG00000024927|ENSMUSG00000027368|ENSMUSG00000022346|ENSMUSG00000028862|…	mmu:66922|mmu:13197|mmu:18021|mmu:102626|mmu:17347|mmu:23882|mmu:18590|mmu:110651|mmu:14173|mmu:17164|mmu:26400|mmu:22059|mmu:13714|mmu:215449|mmu:14182|mmu:18018|mmu:17187|mmu:19697|mmu:13537|mmu:17869|mmu:53608|mmu:15511|mmu:18591|mmu:21813|mmu:18596|mmu:26410|mmu:19252|mmu:11652|mmu:18750|mmu:68794|mmu:67603|mmu:15370|mmu:15507|mmu:19698|mmu:12064|mmu:21926|mmu:109689|mmu:17873|mmu:26416|mmu:1…	66922|13197|18021|102626|17347|23882|18590|110651|14173|17164|26400|22059|13714|215449|14182|18018|17187|19697|13537|17869|53608|15511|18591|21813|18596|26410|19252|11652|18750|68794|67603|15370|15507|19698|12064|21926|109689|17873|26416|16476|14013|18034|26406|16653|21809|14281|21808|21937|14186|16175|16176|16177|193740|15507|19057|12675|224105|11911|18176|20130|19354|320139|192176|18033|19108|1…	http://www.genome.jp/kegg-bin/show_pathway?mmu04010/mmu:224105%09red/mmu:18176%09red/mmu:215449%09red/mmu:14013%09red/mmu:16653%09red/mmu:13714%09red/mmu:14173%09red/mmu:320139%09red/mmu:109689%09red/mmu:21809%09red/mmu:12064%09red/mmu:17187%09red/mmu:17164%09red/mmu:19697%09red/mmu:192176%09red/mmu:12675%09red/mmu:102626%09red/mmu:19698%09red/mmu:21926%09red/mmu:13197%09red/mmu:16476%09red/mmu:2…
Small cell lung cancer	KEGG PATHWAY	mmu05222	33	85	0.00160798	0.0158416	ENSMUSG00000103439|ENSMUSG00000027111|ENSMUSG00000032487|ENSMUSG00000028163|ENSMUSG00000020826|ENSMUSG00000026193|ENSMUSG00000059552|ENSMUSG00000059436|ENSMUSG00000024927|ENSMUSG00000026479|ENSMUSG00000026478|ENSMUSG00000022346|ENSMUSG00000004056|ENSMUSG00000070348|ENSMUSG00000015647|ENSMUSG00000021025|ENSMUSG00000019846|ENSMUSG00000027087|ENSMUSG00000040274|ENSMUSG00000025809|ENSMUSG00000015533|…	mmu:11796|mmu:16403|mmu:19225|mmu:18033|mmu:18126|mmu:14268|mmu:22059|mmu:17187|mmu:19697|mmu:16782|mmu:226519|mmu:17869|mmu:11652|mmu:12443|mmu:16776|mmu:18035|mmu:16775|mmu:16410|mmu:12571|mmu:16412|mmu:16398|mmu:16777|mmu:12675|mmu:320207|mmu:11797|mmu:12043|mmu:12827|mmu:12826|mmu:16399|mmu:11796|mmu:12567|mmu:12048|mmu:19645|	11796|16403|19225|18033|18126|14268|22059|17187|19697|16782|226519|17869|11652|12443|16776|18035|16775|16410|12571|16412|16398|16777|12675|320207|11797|12043|12827|12826|16399|11796|12567|12048|19645|	http://www.genome.jp/kegg-bin/show_pathway?mmu05222/mmu:12571%09red/mmu:320207%09red/mmu:16775%09red/mmu:16777%09red/mmu:16776%09red/mmu:12043%09red/mmu:16403%09red/mmu:16399%09red/mmu:16398%09red/mmu:17187%09red/mmu:12048%09red/mmu:19697%09red/mmu:12675%09red/mmu:14268%09red/mmu:18033%09red/mmu:18035%09red/mmu:12827%09red/mmu:12826%09red/mmu:16410%09red/mmu:226519%09red/mmu:16412%09red/mmu:12567…
Herpes simplex infection	KEGG PATHWAY	mmu05168	64	205	0.0019709	0.0187236	ENSMUSG00000020009|ENSMUSG00000032661|ENSMUSG00000067235|ENSMUSG00000020307|ENSMUSG00000066861|ENSMUSG00000071172|ENSMUSG00000005198|ENSMUSG00000024079|ENSMUSG00000055762|ENSMUSG00000036986|ENSMUSG00000059552|ENSMUSG00000022971|ENSMUSG00000005824|ENSMUSG00000018446|ENSMUSG00000025134|ENSMUSG00000024927|ENSMUSG00000026029|ENSMUSG00000032508|ENSMUSG00000024097|ENSMUSG00000003184|ENSMUSG00000053113|…	mmu:15979|mmu:246727|mmu:101056305|mmu:216150|mmu:23960|mmu:20383|mmu:20020|mmu:19106|mmu:66656|mmu:18854|mmu:22059|mmu:15976|mmu:50930|mmu:12261|mmu:21681|mmu:19697|mmu:12370|mmu:17874|mmu:225027|mmu:54131|mmu:12702|mmu:20684|mmu:20296|mmu:18036|mmu:20846|mmu:20293|mmu:21926|mmu:20382|mmu:102162|mmu:18626|mmu:14972|mmu:12675|mmu:16476|mmu:16193|mmu:15312|mmu:20304|mmu:14281|mmu:13000|mmu:21937|m…	15979|246727|101056305|216150|23960|20383|20020|19106|66656|18854|22059|15976|50930|12261|21681|19697|12370|17874|225027|54131|12702|20684|20296|18036|20846|20293|21926|20382|102162|18626|14972|12675|16476|16193|15312|20304|14281|13000|21937|18035|16452|110557|246730|16176|71586|19247|231805|67615|21354|14964|20383|80509|15957|54123|24088|18033|230073|246728|13163|16391|20847|15975|13665|14102|	http://www.genome.jp/kegg-bin/show_pathway?mmu05168/mmu:23960%09red/mmu:231805%09red/mmu:24088%09red/mmu:16391%09red/mmu:20383%09red/mmu:20382%09red/mmu:15976%09red/mmu:12370%09red/mmu:18854%09red/mmu:14972%09red/mmu:19697%09red/mmu:246727%09red/mmu:246728%09red/mmu:12675%09red/mmu:16193%09red/mmu:71586%09red/mmu:21926%09red/mmu:67615%09red/mmu:13163%09red/mmu:19247%09red/mmu:216150%09red/mmu:666…
RNA transport	KEGG PATHWAY	mmu03013	54	166	0.00207366	0.0190205	ENSMUSG00000027787|ENSMUSG00000032939|ENSMUSG00000069808|ENSMUSG00000030188|ENSMUSG00000091549|ENSMUSG00000029430|ENSMUSG00000051329|ENSMUSG00000021116|ENSMUSG00000005610|ENSMUSG00000056076|ENSMUSG00000057561|ENSMUSG00000058301|ENSMUSG00000063550|ENSMUSG00000028156|ENSMUSG00000037275|ENSMUSG00000045983|ENSMUSG00000101188|ENSMUSG00000027236|ENSMUSG00000078676|ENSMUSG00000022325|ENSMUSG00000027509|…	mmu:97112|mmu:71805|mmu:276919|mmu:66441|mmu:13627|mmu:19384|mmu:59015|mmu:13665|mmu:13690|mmu:27979|mmu:13664|mmu:19704|mmu:269966|mmu:13684|mmu:216766|mmu:208643|mmu:13681|mmu:78655|mmu:192160|mmu:67724|mmu:66679|mmu:227699|mmu:20595|mmu:16211|mmu:21681|mmu:18458|mmu:68626|mmu:18226|mmu:433702|mmu:20901|mmu:116940|mmu:19386|mmu:13669|mmu:53356|mmu:13685|mmu:108989|mmu:218210|mmu:71844|mmu:18141…	97112|71805|276919|66441|13627|19384|59015|13665|13690|27979|13664|19704|269966|13684|216766|208643|13681|78655|192160|67724|66679|227699|20595|16211|21681|18458|68626|18226|433702|20901|116940|19386|13669|53356|13685|108989|218210|71844|18141|192170|55944|269113|67204|72124|209354|230721|226982|20918|13682|13627|67204|16341|26987|217869|	http://www.genome.jp/kegg-bin/show_pathway?mmu03013/mmu:13684%09red/mmu:13685%09red/mmu:13682%09red/mmu:13681%09red/mmu:226982%09red/mmu:269113%09red/mmu:53356%09red/mmu:13665%09red/mmu:192170%09red/mmu:217869%09red/mmu:20918%09red/mmu:16211%09red/mmu:72124%09red/mmu:276919%09red/mmu:16341%09red/mmu:55944%09red/mmu:66441%09red/mmu:59015%09red/mmu:27979%09red/mmu:227699%09red/mmu:66679%09red/mmu:1…
Chronic myeloid leukemia	KEGG PATHWAY	mmu05220	29	73	0.00227837	0.0202016	ENSMUSG00000023067|ENSMUSG00000027684|ENSMUSG00000059552|ENSMUSG00000024927|ENSMUSG00000022346|ENSMUSG00000032440|ENSMUSG00000004056|ENSMUSG00000070348|ENSMUSG00000032402|ENSMUSG00000022952|ENSMUSG00000021025|ENSMUSG00000040274|ENSMUSG00000009681|ENSMUSG00000030265|ENSMUSG00000021253|ENSMUSG00000039239|ENSMUSG00000020184|ENSMUSG00000022637|ENSMUSG00000043733|ENSMUSG00000025199|ENSMUSG00000027852|…	mmu:12575|mmu:14013|mmu:22059|mmu:19697|mmu:17869|mmu:21813|mmu:11652|mmu:12443|mmu:17127|mmu:12394|mmu:18035|mmu:12571|mmu:110279|mmu:16653|mmu:21809|mmu:21808|mmu:17246|mmu:208650|mmu:19247|mmu:12675|mmu:18176|mmu:320207|mmu:20850|mmu:12402|mmu:18033|mmu:12567|mmu:12048|mmu:19645|mmu:271849|	12575|14013|22059|19697|17869|21813|11652|12443|17127|12394|18035|12571|110279|16653|21809|21808|17246|208650|19247|12675|18176|320207|20850|12402|18033|12567|12048|19645|271849|	http://www.genome.jp/kegg-bin/show_pathway?mmu05220/mmu:16653%09red/mmu:12571%09red/mmu:320207%09red/mmu:14013%09red/mmu:12575%09red/mmu:21809%09red/mmu:21808%09red/mmu:208650%09red/mmu:12048%09red/mmu:19697%09red/mmu:21813%09red/mmu:12675%09red/mmu:12394%09red/mmu:110279%09red/mmu:19247%09red/mmu:18033%09red/mmu:18035%09red/mmu:12567%09red/mmu:17246%09red/mmu:18176%09red/mmu:12402%09red/mmu:1244…
Fc gamma R-mediated phagocytosis	KEGG PATHWAY	mmu04666	33	88	0.00251448	0.0215758	ENSMUSG00000033220|ENSMUSG00000006304|ENSMUSG00000026656|ENSMUSG00000047945|ENSMUSG00000021457|ENSMUSG00000004056|ENSMUSG00000030403|ENSMUSG00000029622|ENSMUSG00000021948|ENSMUSG00000033335|ENSMUSG00000052632|ENSMUSG00000079426|ENSMUSG00000083750|ENSMUSG00000050965|ENSMUSG00000015947|ENSMUSG00000026395|ENSMUSG00000034116|ENSMUSG00000029465|ENSMUSG00000029621|ENSMUSG00000044147|ENSMUSG00000003283|…	mmu:19354|mmu:76709|mmu:14130|mmu:17357|mmu:20963|mmu:11652|mmu:22323|mmu:11867|mmu:18753|mmu:13430|mmu:211914|mmu:68089|mmu:12631|mmu:18750|mmu:14129|mmu:19264|mmu:22324|mmu:56378|mmu:56443|mmu:11845|mmu:15162|mmu:67771|mmu:12632|mmu:242687|mmu:17096|mmu:20698|mmu:230837|mmu:18720|mmu:320207|mmu:434782|mmu:16331|mmu:17969|mmu:234779|	19354|76709|14130|17357|20963|11652|22323|11867|18753|13430|211914|68089|12631|18750|14129|19264|22324|56378|56443|11845|15162|67771|12632|242687|17096|20698|230837|18720|320207|434782|16331|17969|234779|	http://www.genome.jp/kegg-bin/show_pathway?mmu04666/mmu:11845%09red/mmu:14130%09red/mmu:68089%09red/mmu:18720%09red/mmu:230837%09red/mmu:16331%09red/mmu:12631%09red/mmu:12632%09red/mmu:20698%09red/mmu:19264%09red/mmu:320207%09red/mmu:22324%09red/mmu:13430%09red/mmu:22323%09red/mmu:234779%09red/mmu:17096%09red/mmu:434782%09red/mmu:11652%09red/mmu:20963%09red/mmu:14129%09red/mmu:18750%09red/mmu:187…
HIF-1 signaling pathway	KEGG PATHWAY	mmu04066	39	111	0.00279714	0.0229157	ENSMUSG00000025877|ENSMUSG00000030339|ENSMUSG00000020009|ENSMUSG00000023067|ENSMUSG00000020190|ENSMUSG00000021367|ENSMUSG00000020826|ENSMUSG00000031465|ENSMUSG00000005533|ENSMUSG00000028645|ENSMUSG00000028156|ENSMUSG00000029648|ENSMUSG00000004056|ENSMUSG00000063229|ENSMUSG00000050965|ENSMUSG00000001131|ENSMUSG00000057329|ENSMUSG00000021109|ENSMUSG00000028978|ENSMUSG00000026773|ENSMUSG00000024927|…	mmu:212032|mmu:17000|mmu:15979|mmu:12575|mmu:17347|mmu:13614|mmu:18126|mmu:11601|mmu:16001|mmu:20525|mmu:13684|mmu:14254|mmu:11652|mmu:16828|mmu:18750|mmu:21857|mmu:12043|mmu:15251|mmu:18127|mmu:170768|mmu:19697|mmu:16194|mmu:16193|mmu:26987|mmu:13685|mmu:13058|mmu:270198|mmu:20525|mmu:22041|mmu:320207|mmu:15368|mmu:18787|mmu:18033|mmu:13866|mmu:15277|mmu:20104|mmu:234779|mmu:21898|mmu:20848|	212032|17000|15979|12575|17347|13614|18126|11601|16001|20525|13684|14254|11652|16828|18750|21857|12043|15251|18127|170768|19697|16194|16193|26987|13685|13058|270198|20525|22041|320207|15368|18787|18033|13866|15277|20104|234779|21898|20848|	http://www.genome.jp/kegg-bin/show_pathway?mmu04066/mmu:13685%09red/mmu:13684%09red/mmu:320207%09red/mmu:270198%09red/mmu:11601%09red/mmu:12575%09red/mmu:15368%09red/mmu:12043%09red/mmu:212032%09red/mmu:19697%09red/mmu:16193%09red/mmu:16194%09red/mmu:15979%09red/mmu:13866%09red/mmu:20525%09red/mmu:13614%09red/mmu:18033%09red/mmu:21898%09red/mmu:18787%09red/mmu:20848%09red/mmu:18126%09red/mmu:1734…
Regulation of actin cytoskeleton	KEGG PATHWAY	mmu04810	66	217	0.00284292	0.0229157	ENSMUSG00000022836|ENSMUSG00000055723|ENSMUSG00000033220|ENSMUSG00000006304|ENSMUSG00000031207|ENSMUSG00000025856|ENSMUSG00000022781|ENSMUSG00000037225|ENSMUSG00000025372|ENSMUSG00000026193|ENSMUSG00000083750|ENSMUSG00000031565|ENSMUSG00000022443|ENSMUSG00000024290|ENSMUSG00000000555|ENSMUSG00000029621|ENSMUSG00000028126|ENSMUSG00000018293|ENSMUSG00000079426|ENSMUSG00000030789|ENSMUSG00000024620|…	mmu:107589|mmu:66922|mmu:19354|mmu:76709|mmu:17698|mmu:18590|mmu:224105|mmu:14173|mmu:108100|mmu:14268|mmu:12631|mmu:14182|mmu:17886|mmu:19877|mmu:16402|mmu:56443|mmu:18720|mmu:18643|mmu:68089|mmu:16411|mmu:18596|mmu:330662|mmu:109700|mmu:109711|mmu:56378|mmu:19241|mmu:381924|mmu:22330|mmu:14186|mmu:320910|mmu:14674|mmu:16403|mmu:67268|mmu:22350|mmu:60595|mmu:22324|mmu:544963|mmu:11867|mmu:16409|…	107589|66922|19354|76709|17698|18590|224105|14173|108100|14268|12631|14182|17886|19877|16402|56443|18720|18643|68089|16411|18596|330662|109700|109711|56378|19241|381924|22330|14186|320910|14674|16403|67268|22350|60595|22324|544963|11867|16409|16412|242687|18591|11465|16410|67771|29875|12632|18176|11461|16398|16653|12475|20130|105855|16408|12061|16414|320207|434782|98932|19878|16399|12062|13367|14…	http://www.genome.jp/kegg-bin/show_pathway?mmu04810/mmu:22350%09red/mmu:224105%09red/mmu:18176%09red/mmu:16409%09red/mmu:16408%09red/mmu:320910%09red/mmu:544963%09red/mmu:12062%09red/mmu:16403%09red/mmu:16402%09red/mmu:16399%09red/mmu:16398%09red/mmu:18643%09red/mmu:12061%09red/mmu:237860%09red/mmu:108100%09red/mmu:66922%09red/mmu:12631%09red/mmu:12632%09red/mmu:14674%09red/mmu:109700%09red/mmu:5…
Epstein-Barr virus infection	KEGG PATHWAY	mmu05169	64	212	0.00374301	0.0292836	ENSMUSG00000029430|ENSMUSG00000067235|ENSMUSG00000048120|ENSMUSG00000029478|ENSMUSG00000002111|ENSMUSG00000023067|ENSMUSG00000005198|ENSMUSG00000024079|ENSMUSG00000021457|ENSMUSG00000031585|ENSMUSG00000018326|ENSMUSG00000059552|ENSMUSG00000004056|ENSMUSG00000052684|ENSMUSG00000024927|ENSMUSG00000026313|ENSMUSG00000022346|ENSMUSG00000090877|ENSMUSG00000026728|ENSMUSG00000003184|ENSMUSG00000031805|…	mmu:19384|mmu:101056305|mmu:12495|mmu:20602|mmu:20375|mmu:12575|mmu:20020|mmu:19106|mmu:20963|mmu:68153|mmu:54401|mmu:22059|mmu:11652|mmu:16476|mmu:19697|mmu:208727|mmu:17869|mmu:15511|mmu:22352|mmu:54131|mmu:16453|mmu:245841|mmu:18034|mmu:66491|mmu:15507|mmu:19698|mmu:14191|mmu:18035|mmu:22631|mmu:67065|mmu:14972|mmu:17999|mmu:12505|mmu:18036|mmu:15894|mmu:74197|mmu:19766|mmu:13000|mmu:17246|mmu…	19384|101056305|12495|20602|20375|12575|20020|19106|20963|68153|54401|22059|11652|16476|19697|208727|17869|15511|22352|54131|16453|245841|18034|66491|15507|19698|14191|18035|22631|67065|14972|17999|12505|18036|15894|74197|19766|13000|17246|17096|12494|110557|26400|69077|193740|15507|12675|14964|22123|16408|19664|320207|20848|18033|230073|19108|53859|26416|234779|16155|26397|19645|12043|21929|	http://www.genome.jp/kegg-bin/show_pathway?mmu05169/mmu:67065%09red/mmu:12495%09red/mmu:22352%09red/mmu:320207%09red/mmu:19766%09red/mmu:12575%09red/mmu:16408%09red/mmu:12043%09red/mmu:66491%09red/mmu:21929%09red/mmu:19697%09red/mmu:20602%09red/mmu:17999%09red/mmu:12675%09red/mmu:19698%09red/mmu:26416%09red/mmu:110557%09red/mmu:20375%09red/mmu:12494%09red/mmu:19106%09red/mmu:22631%09red/mmu:18033…
HTLV-I infection	KEGG PATHWAY	mmu05166	79	277	0.00483527	0.0367481	ENSMUSG00000030170|ENSMUSG00000055723|ENSMUSG00000067235|ENSMUSG00000002111|ENSMUSG00000023067|ENSMUSG00000029430|ENSMUSG00000025856|ENSMUSG00000022895|ENSMUSG00000063889|ENSMUSG00000034165|ENSMUSG00000030527|ENSMUSG00000059552|ENSMUSG00000026436|ENSMUSG00000023027|ENSMUSG00000004056|ENSMUSG00000024912|ENSMUSG00000033016|ENSMUSG00000028645|ENSMUSG00000024927|ENSMUSG00000037405|ENSMUSG00000022220|…	mmu:22419|mmu:66922|mmu:101056305|mmu:20375|mmu:12575|mmu:19384|mmu:18590|mmu:23872|mmu:12916|mmu:12445|mmu:70461|mmu:22059|mmu:13714|mmu:11908|mmu:11652|mmu:14283|mmu:18018|mmu:20525|mmu:19697|mmu:15894|mmu:104110|mmu:17869|mmu:12912|mmu:18591|mmu:21813|mmu:18596|mmu:16453|mmu:18021|mmu:12443|mmu:12257|mmu:13653|mmu:19698|mmu:14366|mmu:21926|mmu:14370|mmu:12444|mmu:18974|mmu:14972|mmu:17127|mmu:…	22419|66922|101056305|20375|12575|19384|18590|23872|12916|12445|70461|22059|13714|11908|11652|14283|18018|20525|19697|15894|104110|17869|12912|18591|21813|18596|16453|18021|12443|12257|13653|19698|14366|21926|14370|12444|18974|14972|17127|16476|18034|26406|16653|21809|14281|21808|14964|17000|21937|18035|110557|14369|18176|21894|20525|18538|19057|12675|11911|13714|16408|20130|16414|320207|20850|18…	http://www.genome.jp/kegg-bin/show_pathway?mmu05166/mmu:16653%09red/mmu:18033%09red/mmu:23872%09red/mmu:14964%09red/mmu:12575%09red/mmu:16408%09red/mmu:13714%09red/mmu:21809%09red/mmu:18974%09red/mmu:12048%09red/mmu:19697%09red/mmu:14366%09red/mmu:70461%09red/mmu:12675%09red/mmu:16193%09red/mmu:19698%09red/mmu:21926%09red/mmu:66922%09red/mmu:110557%09red/mmu:20375%09red/mmu:19057%09red/mmu:20525%…

## Sheet: SCI(VX-765) vs SCI(DMSO)
##Databases: KEGG PATHWAY
##Statistical test method: hypergeometric test / Fisher's exact test
##FDR correction method: Benjamini and Hochberg
